# Supplementary material for: Genotype and Phenotype Characterization of Rhinolophus sp. Sarbecoviruses from Vietnam: Implications for Coronavirus Emergence
Source: MDPI journal article supplement (doi:10.3390/v15091897), 2023-09-08
Supplement: s1 [file s1]

**A.**

ACE2 usage

Test for *in silico* RBD/ACE2 interaction

0.1

**B.**

SARS-CoV contact residues

NC\_004718\_Human\_Tor2\_Canada\_2004 RQ I APGQTGVI ADYNYKLPDDFMGCVLAWNTRN I DATSTGNNYKYRYLRHGKLRPFERD I SNVPFSPDGKPCPT P PALNCYWPLNDYGFYTTTG IGYQPYRVV

AY572034\_Paguma\_larvata\_007/2004\_China\_2004 . . . . . S . . . . . P . . . . . RG . . . . . S . . . . .

AY572038\_Paguma\_larvata\_civet020\_China\_2004 . . . . . P . . . . . RG . . . . . S . . . . .

KF569996\_Rhinolophus\_affinis\_LYRa11\_China\_2011 . . . . . S . . . . . F . . . . . S . . . . . F . . . . . N . . . . .

MZ937002\_Rhinolophus\_malayanus\_BANAL-20-116\_Laos\_2020 . . . . . E . . . . . T . . . . . AQQ I G S F SH AV K . . . . . L SDE GVRT ST D NPNVPLD . AT . . . . .

RtVN21-192\_Rhinolophus\_thomasi\_Vietnam\_2021 . V . . . E . . . . . T . . . I . . AKQ TG Y Y SH KT K . . . . . L SDD GVYT ST D NPNVPA . AT . . . . .

RtVN21-197\_Rhinolophus\_thomasi\_Vietnam\_2021 . V . . . E . . . . . T . . . I . . AKQ TG Y Y SH KT K . . . . . L SDD GVYT ST D NPNVPVT . AT . . . . .

RtVN21-200\_Rhinolophus\_thomasi\_Vietnam\_2021 . V . . . E . . . . . T . . . I . . AKQ TG Y Y SH KT K . . . . . L SDD GVYT ST D NPNVPVT . AT . . . . .

RtVN21-201\_Rhinolophus\_thomasi\_Vietnam\_2021 . V . . . E . . . . . T . . . I . . AKQ TG Y Y SH KT K . . . . . L SDD GVYT ST D NPNVPVT . AT . . . . .

RtVN21-29\_Rhinolophus\_thomasi\_Vietnam\_2021 . V . . . E . . . . . T . . . I . . AKQ QG Y Y SH KI K . . . . . L SDE GVRT ST D NPNVPLD . AT . . . . .

RtVN21-193\_Rhinolophus\_thomasi\_Vietnam\_2021 . V . . . E . . . . . T . . . I . . AKQ VG S F SH SS K . . . . . L SDE GVYT ST D NPNVPLD . AT . . . . .

RsVN21-195\_Rhinolophus\_siamensis\_Vietnam\_2021 . V . . . E . . . . . T . . . I . . AKQ VG S F SH SS K . . . . . L SDE GVYT ST D NPNVPLD . AT . . . . .

Consensus RQVAPGETGVI ADYNYKLPDDFTGCVI AWNTAKQDXG - - - YYYRSHRKXKLPFERDLSSDX - - - G - - - - - NGVYTLSTYDFNPNVPXXYQATRVV

Conservation 100% 0% 4.3bits

Sequence logo 0.0bits

SARS-CoV-2 contact residues

EPI\_ISL\_406798\_Human\_Wuhan/WH01/2019\_China\_2019 RQ I APGQTGKI ADYNYKLPDDFTGCVI AWNSNLDKVGNGNYLYRLFRKSNLKPFERD ISTE I YQAGSTPCNGVEGFNCYFPLQSYGFQPTNGVGYQPYRVV

AY572034\_Paguma\_larvata\_007/2004\_China\_2004 . . . . . V . . . . . M . . . L . . TR I . ATST . . . . . K . YL HGK R . . . . . NVPFSSDGK . TP PAP . . W . RG . . YT S I . . . . .

AY572038\_Paguma\_larvata\_civet020\_China\_2004 . . . . . V . . . . . M . . . L . . TR I . ATST . . . . . K . YL HGK R . . . . . NVPFSPDGK . TP PAP . . W . RG . . YT S I . . . . .

KF569996\_Rhinolophus\_affinis\_LYRa11\_China\_2011 . . . . . V . . . . . M . . . L . . TR I . ATSS . F . K . SL HGK R . . . . . NVPFSPDGK . TP PA . . W . ND . . YT . . I . . . . .

MZ937002\_Rhinolophus\_malayanus\_BANAL-20-116\_Laos\_2020 . . . . . E . V . . . . . L . TAQQ I G S F SH AVK . . . . . L SDE GVRT ST D N NVPLD . AT . . . . .

RtVN21-192\_Rhinolophus\_thomasi\_Vietnam\_2021 . V . . . E . V . . . . . TAKQ TG Y Y SH TK . . . . . L SDD GVRT ST D N NVP A . AT . . . . .

RtVN21-197\_Rhinolophus\_thomasi\_Vietnam\_2021 . V . . . E . V . . . . . TAKQ TG Y Y SH TK . . . . . L SDD GVRT ST D N NVP T . AT . . . . .

RtVN21-200\_Rhinolophus\_thomasi\_Vietnam\_2021 . V . . . E . V . . . . . TAKQ TG Y Y SH TK . . . . . L SDD GVRT ST D N NVP T . AT . . . . .

RtVN21-201\_Rhinolophus\_thomasi\_Vietnam\_2021 . V . . . E . V . . . . . TAKQ TG Y Y SH TK . . . . . L SDD GVRT ST D N NVP T . AT . . . . .

RtVN21-29\_Rhinolophus\_thomasi\_Vietnam\_2021 . V . . . E . V . . . . . TAKQ QG Y Y SH IK . . . . . L SDE GVRT ST D N NVPLD . AT . . . . .

RtVN21-193\_Rhinolophus\_thomasi\_Vietnam\_2021 . V . . . E . V . . . . . TAKQ VG S F SH S K . . . . . L SDE GVYT ST D N NVPLD . AT . . . . .

RsVN21-195\_Rhinolophus\_siamensis\_Vietnam\_2021 . V . . . E . V . . . . . TAKQ VG S F SH S K . . . . . L SDE GVYT ST D N NVPLD . AT . . . . .

Consensus RQVAPGETGVI ADYNYKLPDDFTGCVI AWNTAKQDTG - - - YYYRSHRKTKLPFERDLSSDX - - - G - - - - - NGVYTLSTYDFNPNVPVXYQATRVV

Conservation 100% 0% 4.3bits

Sequence logo 0.0bits
