# Supplementary material for: Genotype and Phenotype Characterization of Rhinolophus sp. Sarbecoviruses from Vietnam: Implications for Coronavirus Emergence
Source: MDPI journal article supplement (doi:10.3390/v15091897), 2023-09-08
Supplement: s1 [file s1]

| ORF1a           |            | 1      | 2      | 3      | 4      | 5      | 6      | 7      | NT identity (%) |
|-----------------|------------|--------|--------|--------|--------|--------|--------|--------|-----------------|
| 1               | RtVN21-29  | –      | 95,19  | 94,59  | 94,59  | 99,66  | 99,66  | 99,66  |                 |
| 2               | RtVN21-192 | 96,21  | –      | 92,43  | 92,45  | 95,12  | 95,12  | 95,12  |                 |
| 3               | RtVN21-193 | 96,81  | 95,30  | –      | 99,82  | 94,58  | 94,58  | 94,58  |                 |
| 4               | RsVN21-195 | 96,85  | 95,32  | 99,84  | –      | 94,58  | 94,58  | 94,58  |                 |
| 5               | RtVN21-197 | 99,50  | 96,28  | 96,97  | 97,01  | –      | 100,00 | 100,00 |                 |
| 6               | RtVN21-200 | 99,50  | 96,28  | 96,97  | 97,01  | 100,00 | –      | 100,00 |                 |
| 7               | RtVN21-201 | 99,50  | 96,28  | 96,97  | 97,01  | 100,00 | 100,00 | –      |                 |
| AA identity (%) |            |        |        |        |        |        |        |        | NT identity (%) |
| S               |            | 1      | 2      | 3      | 4      | 5      | 6      | 7      |                 |
| 1               | RtVN21-29  | –      | 82,47  | 79,03  | 79,03  | 82,49  | 82,47  | 82,47  |                 |
| 2               | RtVN21-192 | 86,64  | –      | 78,75  | 78,80  | 99,84  | 99,81  | 99,81  |                 |
| 3               | RtVN21-193 | 83,51  | 83,60  | –      | 99,95  | 78,78  | 78,75  | 78,75  |                 |
| 4               | RsVN21-195 | 83,59  | 83,68  | 99,92  | –      | 78,83  | 78,80  | 78,80  |                 |
| 5               | RtVN21-197 | 86,64  | 99,92  | 83,60  | 83,68  | –      | 99,97  | 99,97  |                 |
| 6               | RtVN21-200 | 86,64  | 99,92  | 83,60  | 83,68  | 100,00 | –      | 100,00 |                 |
| 7               | RtVN21-201 | 86,64  | 99,92  | 83,60  | 83,68  | 100,00 | 100,00 | –      |                 |
| AA identity (%) |            |        |        |        |        |        |        |        | NT identity (%) |
| E               |            | 1      | 2      | 3      | 4      | 5      | 6      | 7      |                 |
| 1               | RtVN21-29  | –      | 97,40  | 96,97  | 96,97  | 97,40  | 97,40  | 97,40  |                 |
| 2               | RtVN21-192 | 97,40  | –      | 98,70  | 98,70  | 100,00 | 100,00 | 100,00 |                 |
| 3               | RtVN21-193 | 97,40  | 100,00 | –      | 100,00 | 98,70  | 98,70  | 98,70  |                 |
| 4               | RsVN21-195 | 97,40  | 100,00 | 100,00 | –      | 98,70  | 98,70  | 98,70  |                 |
| 5               | RtVN21-197 | 97,40  | 100,00 | 100,00 | 100,00 | –      | 100,00 | 100,00 |                 |
| 6               | RtVN21-200 | 97,40  | 100,00 | 100,00 | 100,00 | 100,00 | –      | 100,00 |                 |
| 7               | RtVN21-201 | 97,40  | 100,00 | 100,00 | 100,00 | 100,00 | 100,00 | –      |                 |
| AA identity (%) |            |        |        |        |        |        |        |        | NT identity (%) |
| ORF6            |            | 1      | 2      | 3      | 4      | 5      | 6      | 7      |                 |
| 1               | RtVN21-29  | –      | 97,88  | 89,06  | 89,06  | 97,35  | 97,35  | 97,35  |                 |
| 2               | RtVN21-192 | 98,41  | –      | 90,62  | 90,62  | 99,47  | 99,47  | 99,47  |                 |
| 3               | RtVN21-193 | 85,94  | 87,50  | –      | 100,00 | 90,10  | 90,10  | 90,10  |                 |
| 4               | RsVN21-195 | 85,94  | 87,50  | 100,00 | –      | 90,10  | 90,10  | 90,10  |                 |
| 5               | RtVN21-197 | 96,83  | 98,41  | 85,94  | 85,94  | –      | 100,00 | 100,00 |                 |
| 6               | RtVN21-200 | 96,83  | 98,41  | 85,94  | 85,94  | 100,00 | –      | 100,00 |                 |
| 7               | RtVN21-201 | 96,83  | 98,41  | 85,94  | 85,94  | 100,00 | 100,00 | –      |                 |
| AA identity (%) |            |        |        |        |        |        |        |        | NT identity (%) |
| ORF7b           |            | 1      | 2      | 3      | 4      | 5      | 6      | 7      |                 |
| 1               | RtVN21-29  | –      | 99,26  | 94,81  | 94,81  | 99,26  | 99,26  | 99,26  |                 |
| 2               | RtVN21-192 | 100,00 | –      | 94,81  | 94,81  | 100,00 | 100,00 | 100,00 |                 |
| 3               | RtVN21-193 | 97,78  | 97,78  | –      | 100,00 | 94,81  | 94,81  | 94,81  |                 |
| 4               | RsVN21-195 | 97,78  | 97,78  | 100,00 | –      | 94,81  | 94,81  | 94,81  |                 |
| 5               | RtVN21-197 | 100,00 | 100,00 | 97,78  | 97,78  | –      | 100,00 | 100,00 |                 |
| 6               | RtVN21-200 | 100,00 | 100,00 | 97,78  | 97,78  | 100,00 | –      | 100,00 |                 |
| 7               | RtVN21-201 | 100,00 | 100,00 | 97,78  | 97,78  | 100,00 | 100,00 | –      |                 |
| AA identity (%) |            |        |        |        |        |        |        |        | NT identity (%) |
| N               |            | 1      | 2      | 3      | 4      | 5      | 6      | 7      |                 |
| 1               | RtVN21-29  | –      | 97,95  | 95,51  | 95,51  | 97,63  | 97,63  | 97,63  |                 |
| 2               | RtVN21-192 | 99,05  | –      | 96,06  | 96,06  | 98,82  | 98,82  | 98,82  |                 |
| 3               | RtVN21-193 | 97,16  | 97,16  | –      | 99,92  | 96,38  | 96,38  | 96,38  |                 |
| 4               | RsVN21-195 | 97,16  | 97,16  | 100,00 | –      | 96,38  | 96,38  | 96,38  |                 |
| 5               | RtVN21-197 | 98,82  | 98,82  | 97,16  | 97,16  | –      | 100,00 | 100,00 |                 |
| 6               | RtVN21-200 | 98,82  | 98,82  | 97,16  | 97,16  | 100,00 | –      | 100,00 |                 |
| 7               | RtVN21-201 | 98,82  | 98,82  | 97,16  | 97,16  | 100,00 | 100,00 | –      |                 |
| AA identity (%) |            |        |        |        |        |        |        |        | NT identity (%) |
| ORF1b           |            | 1      | 2      | 3      | 4      | 5      | 6      | 7      |                 |
| 1               | RtVN21-29  | –      | 94,23  | 92,54  | 92,54  | 96,40  | 96,39  | 96,39  |                 |
| 2               | RtVN21-192 | 99,24  | –      | 91,70  | 91,72  | 97,54  | 97,54  | 97,53  |                 |
| 3               | RtVN21-193 | 99,09  | 99,09  | –      | 99,88  | 92,78  | 92,77  | 92,77  |                 |
| 4               | RsVN21-195 | 99,05  | 99,05  | 99,96  | –      | 92,78  | 92,78  | 92,78  |                 |
| 5               | RtVN21-197 | 99,32  | 99,85  | 99,16  | 99,13  | –      | 100,00 | 99,99  |                 |
| 6               | RtVN21-200 | 99,32  | 99,85  | 99,16  | 99,13  | 100,00 | –      | 100,00 |                 |
| 7               | RtVN21-201 | 99,32  | 99,85  | 99,16  | 99,13  | 100,00 | 100,00 | –      |                 |
| AA identity (%) |            |        |        |        |        |        |        |        | NT identity (%) |
| ORF3a           |            | 1      | 2      | 3      | 4      | 5      | 6      | 7      |                 |
| 1               | RtVN21-29  | –      | 90,18  | 81,70  | 81,70  | 90,18  | 90,18  | 90,06  |                 |
| 2               | RtVN21-192 | 90,91  | –      | 90,06  | 90,06  | 100,00 | 100,00 | 99,88  |                 |
| 3               | RtVN21-193 | 82,18  | 89,45  | –      | 99,76  | 90,06  | 90,06  | 89,94  |                 |
| 4               | RsVN21-195 | 81,82  | 89,09  | 99,64  | –      | 90,06  | 90,06  | 89,94  |                 |
| 5               | RtVN21-197 | 90,91  | 100,00 | 89,45  | 89,09  | –      | 100,00 | 99,88  |                 |
| 6               | RtVN21-200 | 90,91  | 100,00 | 89,45  | 89,09  | 100,00 | –      | 99,88  |                 |
| 7               | RtVN21-201 | 90,55  | 99,64  | 89,09  | 88,73  | 99,64  | 99,64  | –      |                 |
| AA identity (%) |            |        |        |        |        |        |        |        | NT identity (%) |
| M               |            | 1      | 2      | 3      | 4      | 5      | 6      | 7      |                 |
| 1               | RtVN21-29  | –      | 95,35  | 94,59  | 94,74  | 95,35  | 95,35  | 95,35  |                 |
| 2               | RtVN21-192 | 99,55  | –      | 95,05  | 95,20  | 100,00 | 100,00 | 100,00 |                 |
| 3               | RtVN21-193 | 97,75  | 97,30  | –      | 99,85  | 95,05  | 95,05  | 95,05  |                 |
| 4               | RsVN21-195 | 98,20  | 97,75  | 99,55  | –      | 95,20  | 95,20  | 95,20  |                 |
| 5               | RtVN21-197 | 99,55  | 100,00 | 97,30  | 97,75  | –      | 100,00 | 100,00 |                 |
| 6               | RtVN21-200 | 99,55  | 100,00 | 97,30  | 97,75  | 100,00 | –      | 100,00 |                 |
| 7               | RtVN21-201 | 99,55  | 100,00 | 97,30  | 97,75  | 100,00 | 100,00 | –      |                 |
| AA identity (%) |            |        |        |        |        |        |        |        | NT identity (%) |
| ORF7a           |            | 1      | 2      | 3      | 4      | 5      | 6      | 7      |                 |
| 1               | RtVN21-29  | –      | 97,56  | 91,87  | 91,87  | 97,83  | 97,83  | 97,83  |                 |
| 2               | RtVN21-192 | 98,37  | –      | 91,33  | 91,33  | 99,19  | 99,19  | 99,19  |                 |
| 3               | RtVN21-193 | 94,31  | 94,31  | –      | 100,00 | 91,60  | 91,60  | 91,60  |                 |
| 4               | RsVN21-195 | 94,31  | 94,31  | 100,00 | –      | 91,60  | 91,60  | 91,60  |                 |
| 5               | RtVN21-197 | 99,19  | 99,19  | 95,12  | 95,12  | –      | 100,00 | 100,00 |                 |
| 6               | RtVN21-200 | 99,19  | 99,19  | 95,12  | 95,12  | 100,00 | –      | 100,00 |                 |
| 7               | RtVN21-201 | 99,19  | 99,19  | 95,12  | 95,12  | 100,00 | 100,00 | –      |                 |
| AA identity (%) |            |        |        |        |        |        |        |        | NT identity (%) |
| ORF8            |            | 1      | 2      | 3      | 4      | 5      | 6      | 7      |                 |
| 1               | RtVN21-29  | –      | 86,07  | 79,78  | 79,78  | 96,45  | 96,45  | 96,45  |                 |
| 2               | RtVN21-192 | 86,89  | –      | 74,04  | 74,04  | 89,62  | 89,62  | 89,62  |                 |
| 3               | RtVN21-193 | 78,69  | 73,77  | –      | 100,00 | 79,51  | 79,51  | 79,51  |                 |
| 4               | RsVN21-195 | 78,69  | 73,77  | 100,00 | –      | 79,51  | 79,51  | 79,51  |                 |
| 5               | RtVN21-197 | 97,54  | 89,34  | 80,33  | 80,33  | –      | 100,00 | 100,00 |                 |
| 6               | RtVN21-200 | 97,54  | 89,34  | 80,33  | 80,33  | 100,00 | –      | 100,00 |                 |
| 7               | RtVN21-201 | 97,54  | 89,34  | 80,33  | 80,33  | 100,00 | 100,00 | –      |                 |
| AA identity (%) |            |        |        |        |        |        |        |        | NT identity (%) |
| ORF10           |            | 1      | 2      | 3      | 4      | 5      | 6      | 7      |                 |
| 1               | RtVN21-29  | –      | 100,00 | 100,00 | 100,00 | 100,00 | 100,00 | 100,00 |                 |
| 2               | RtVN21-192 | 100,00 | –      | 100,00 | 100,00 | 100,00 | 100,00 | 100,00 |                 |
| 3               | RtVN21-193 | 100,00 | 100,00 | –      | 100,00 | 100,00 | 100,00 | 100,00 |                 |
| 4               | RsVN21-195 | 100,00 | 100,00 | 100,00 | –      | 100,00 | 100,00 | 100,00 |                 |
| 5               | RtVN21-197 | 100,00 | 100,00 | 100,00 | 100,00 | –      | 100,00 | 100,00 |                 |
| 6               | RtVN21-200 | 100,00 | 100,00 | 100,00 | 100,00 | 100,00 | –      | 1      |                 |
